# Supplementary material for: Is treatment in certified cancer centers related to better survival in patients with pancreatic cancer? Evidence from a large German cohort study
Source: PubMed Central journal article supplement (PMC9172168; doi:10.1186/s12885-022-09731-w), 2022-06-07
Supplement: 12885_2022_9731_MOESM1_ESM.pdf [file 12885_2022_9731_MOESM1_ESM.pdf]

## Additional file 1: Supplementary material

### Is treatment in certified cancer centers related to better survival in patients with pancreatic cancer? Evidence from a large German cohort study

Martin Roessler<sup>a</sup>, Jochen Schmitt<sup>a</sup>, Christoph Bobeth<sup>a</sup>, Michael Gerken<sup>b</sup>, Kees Kleihues-van Tol<sup>c</sup>, Christoph Reissfelder<sup>d</sup>, Bettina M. Rau<sup>e</sup>, Marius Distler<sup>f,g</sup>, Pompiliu Piso<sup>h</sup>, Christian Günster<sup>i</sup>, Monika Klinkhammer-Schalke<sup>b</sup>, Olaf Schoffer<sup>a</sup>, Veronika Bierbaum<sup>a</sup>

<sup>a</sup>Center for Evidence-Based Healthcare (ZEGV), University Hospital Carl Gustav Carus and Carl Gustav Carus Faculty of Medicine, TU Dresden, Dresden, Germany

<sup>b</sup>Tumorzentrum Regensburg - Institut für Qualitätssicherung und Versorgungsforschung der Universität Regensburg, Regensburg, Germany

<sup>c</sup>Association of German Tumor Centers (ADT), Berlin, Germany

<sup>d</sup>Department of Surgery, Universitätsmedizin Mannheim, Medical Faculty Mannheim, Heidelberg University, Mannheim, Germany

<sup>e</sup>Department of General, Visceral and Thoracic Surgery, Hospital of Neumarkt, Neumarkt in der Oberpfalz, Germany

<sup>f</sup>Technische Universität Dresden, Faculty of Medicine and University Hospital Carl Gustav Carus, Department of Visceral-, Thoracic and Vascular Surgery,

<sup>g</sup>National Center for Tumor Diseases (NCT/UCC), Dresden, Germany; German Cancer Research Center (DKFZ), Heidelberg, Germany; Faculty of Medicine and University Hospital Carl Gustav Carus, Technische Universität Dresden, Dresden, Germany; Helmholtz-Zentrum Dresden - Rossendorf (HZDR), Dresden, Germany

<sup>h</sup>Department of General and Visceral Surgery, Barmherzige Brüder Hospital Regensburg, Regensburg, Germany

<sup>i</sup>AOK Research Institute (WIdO), Berlin, Germany

#### Exclusion criteria

In a first step, the following criteria were used by WIdO to select insured persons potentially eligible to be included in the analyses: Ensured with the AOK for at least one day within the period 2006-2017; German postal code; At least one diagnosis of pancreatic cancer (ICD-10-GM: C25) within the period 2006-2017.

In a second step, the following sequential exclusion criteria (with rationales) were applied:

1. Not insured the over whole period (Relevant diagnoses, treatments, and events (incl. death) may not be observed)
2. No primary inpatient diagnosis (The primary inpatient diagnosis indicates entity-specific treatment in a hospital; the focus of the analysis was on survival differences between patients with center and non-center treatments)
3. Age < 18 years (Analysis was restricted to the adult population to exclude rare, special cases of pancreatic cancer)
4. Washout: No inpatient or outpatient diagnosis of pancreatic cancer in the period 2006-2008 (Used for identification of incident cases of pancreatic cancer)
5. Treatment in a hospital which became a certified center within 1 year (Hospitals are likely to have already established structures required for certification before the certificate is issued; patients treated in this 1-year period before certification therefore are likely to have effectively received center treatment)

6. Primary resection more than 6 months after index treatment (Primary tumor resection was used for definition of index treatment only if it occurs within a reasonable time frame after the first relevant inpatient diagnosis of pancreatic cancer; other cases may have low plausibility)
7. Survival time of zero (patients dying at the date of index treatment may not benefit from treatment in certified center)
8. Missing hospital characteristics (The full regression model adjusts for hospital characteristics that represent potential confounders of center treatment. Patients treated in hospitals for which those characteristics were unknown were excluded to ensure comparability of results between different model specifications, i.e. complete case analysis)
- 9.

### **Time from first diagnosis to index treatment**

Since survival time in our main analysis was defined as time since index treatment, one concern is the presence of immortal time bias. While we cannot exclude such bias, our data shows that the majority of pancreatic cancer patients was treated immediately after diagnosis in both certified pancreatic cancer centers and non-certified hospitals. 90% of all patients received index treatment within 33 days after diagnosis in pancreatic cancer centers and within 41 days in non-certified hospitals.

## 1 Supplementary tables

2 Table S1: Covariates and data sources

| Covariate                       | Description                                                                                                                                                     | Data source               |
|---------------------------------|-----------------------------------------------------------------------------------------------------------------------------------------------------------------|---------------------------|
| Age                             | Age at diagnosis (in years)                                                                                                                                     | AOK health insurance data |
| Sex                             | Persons' sex as documented in health insurance data (male/female)                                                                                               | AOK health insurance data |
| Distant metastasis              | Primary or secondary inpatient or outpatient diagnosis of distant metastasis (ICD-10-GM: C77-C79) prior to or at index treatment (no/yes)                       | AOK health insurance data |
| Other oncological disease       | Primary or secondary inpatient or outpatient diagnosis of other oncological disease (ICD-10-GM: C without C25, C77-C79) prior to or at index treatment (no/yes) | AOK health insurance data |
| Congestive heart failure        | Primary or secondary inpatient or outpatient diagnosis of congestive heart failure according to Elixhauser et al. (1998) (yes/no)                               | AOK health insurance data |
| Cardiac arrhythmias             | Primary or secondary inpatient or outpatient diagnosis of cardiac arrhythmias according to Elixhauser et al. (1998) (yes/no)                                    | AOK health insurance data |
| Valvular disease                | Primary or secondary inpatient or outpatient diagnosis of valvular disease according to Elixhauser et al. (1998) (yes/no)                                       | AOK health insurance data |
| Pulmonary circulation disorders | Primary or secondary inpatient or outpatient diagnosis of pulmonary circulation disorders according to Elixhauser et al. (1998) (yes/no)                        | AOK health insurance data |
| Periph. vascular disorders      | Primary or secondary inpatient or outpatient diagnosis of periph. vascular disorders according to Elixhauser et al. (1998) (yes/no)                             | AOK health insurance data |
| Hypertension, (uc)              | Primary or secondary inpatient or outpatient diagnosis of hypertension, (uncomplicated) according to Elixhauser et al. (1998) (yes/no)                          | AOK health insurance data |
| Hypertension, (c)               | Primary or secondary inpatient or outpatient diagnosis of hypertension, (complicated) according to Elixhauser et al. (1998) (yes/no)                            | AOK health insurance data |
| Other neurological disorders    | Primary or secondary inpatient or outpatient diagnosis of other neurological disorders according to Elixhauser et al. (1998) (yes/no)                           | AOK health insurance data |
| Chronic pulmonary disease       | Primary or secondary inpatient or outpatient diagnosis of chronic pulmonary disease according to Elixhauser et al. (1998) (yes/no)                              | AOK health insurance data |
| Diabetes (uc)                   | Primary or secondary inpatient or outpatient diagnosis of diabetes (uncomplicated) according to Elixhauser et al. (1998) (yes/no)                               | AOK health insurance data |
| Diabetes (c)                    | Primary or secondary inpatient or outpatient diagnosis of diabetes (complicated) according to Elixhauser et al. (1998) (yes/no)                                 | AOK health insurance data |

|                     |                                                                                                                            |                                     |
|---------------------|----------------------------------------------------------------------------------------------------------------------------|-------------------------------------|
| Renal failure       | Primary or secondary inpatient or outpatient diagnosis of renal failure according to Elixhauser et al. (1998) (yes/no)     | AOK health insurance data           |
| Liver disease       | Primary or secondary inpatient or outpatient diagnosis of liver disease according to Elixhauser et al. (1998) (yes/no)     | AOK health insurance data           |
| Blood loss anemia   | Primary or secondary inpatient or outpatient diagnosis of blood loss anemia according to Elixhauser et al. (1998) (yes/no) | AOK health insurance data           |
| Deficiency anemia   | Primary or secondary inpatient or outpatient diagnosis of deficiency anemia according to Elixhauser et al. (1998) (yes/no) | AOK health insurance data           |
| Alcohol abuse       | Primary or secondary inpatient or outpatient diagnosis of alcohol abuse according to Elixhauser et al. (1998) (yes/no)     | AOK health insurance data           |
| Drug abuse          | Primary or secondary inpatient or outpatient diagnosis of drug abuse according to Elixhauser et al. (1998) (yes/no)        | AOK health insurance data           |
| Hospital beds       | Number of hospital beds (1-299, 300-499, 500-999, 1000+)                                                                   | German Standardized Quality Reports |
| Teaching hospital   | Hospital has teaching hospital status (yes/no)                                                                             | German Standardized Quality Reports |
| University hospital | Hospital has university hospital status (yes/no)                                                                           | German Standardized Quality Reports |
| Hospital ownership  | Type of hospital ownership (public/non-profit/private) reported                                                            | German Standardized Quality Reports |

3 Elixhauser, A., Steiner, C., Harris, D. R., & Coffey, R. M. (1998). Comorbidity measures for use with administrative data. *Medical Care*, 36(1): 8-27. Note: Outpatient  
4 diagnoses were considered only if they were documented in at least two of four successive quarters.

5

6 Table S2: Full descriptive statistics

| Variable                              | Certified: no | (n=39,892) | Certified: yes | (n=5,426) |
|---------------------------------------|---------------|------------|----------------|-----------|
| Age in years, Median (Q1;Q3)          | 74            | (67;81)    | 73             | (64;79)   |
| Sex, n (%)                            |               |            |                |           |
| female                                | 20,859        | (52.3%)    | 2,754          | (50.8%)   |
| male                                  | 19,033        | (47.7%)    | 2,672          | (49.2%)   |
| Congestive heart failure, n(%)        |               |            |                |           |
| no                                    | 25,763        | (64.6%)    | 3,629          | (66.9%)   |
| yes                                   | 14,129        | (35.4%)    | 1,797          | (33.1%)   |
| Cardiac arrhythmias, n(%)             |               |            |                |           |
| no                                    | 24,947        | (62.5%)    | 3,239          | (59.7%)   |
| yes                                   | 14,945        | (37.5%)    | 2,187          | (40.3%)   |
| Valvular disease , n(%)               |               |            |                |           |
| no                                    | 31,809        | (79.7%)    | 4,199          | (77.4%)   |
| yes                                   | 8,083         | (20.3%)    | 1,227          | (22.6%)   |
| Pulmonary circulation disorders, n(%) |               |            |                |           |
| no                                    | 36,335        | (91.1%)    | 4,907          | (90.4%)   |
| yes                                   | 3,557         | (8.9%)     | 519            | (9.6%)    |
| Periph. vascular disorders, n(%)      |               |            |                |           |
| no                                    | 25,889        | (64.9%)    | 3,370          | (62.1%)   |
| yes                                   | 14,003        | (35.1%)    | 2,056          | (37.9%)   |
| Hypertension, (uc), n(%)              |               |            |                |           |
| no                                    | 6,555         | (16.4%)    | 948            | (17.5%)   |
| yes                                   | 33,337        | (83.6%)    | 4,478          | (82.5%)   |
| Hypertension, (c), n(%)               |               |            |                |           |
| no                                    | 28,427        | (71.3%)    | 3,826          | (70.5%)   |
| yes                                   | 11,465        | (28.7%)    | 1,600          | (29.5%)   |
| Other neurological disorders, n(%)    |               |            |                |           |
| no                                    | 35,364        | (88.6%)    | 4,825          | (88.9%)   |
| yes                                   | 4,528         | (11.4%)    | 601            | (11.1%)   |
| Chronic pulmonary disease, n(%)       |               |            |                |           |
| no                                    | 21,905        | (54.9%)    | 2,632          | (48.5%)   |
| yes                                   | 17,987        | (45.1%)    | 2,794          | (51.5%)   |
| Diabetes (uc) , n(%)                  |               |            |                |           |
| no                                    | 18,836        | (47.2%)    | 2,538          | (46.8%)   |
| yes                                   | 21,056        | (52.8%)    | 2,888          | (53.2%)   |
| Diabetes (c), n(%)                    |               |            |                |           |
| no                                    | 28,737        | (72%)      | 3,835          | (70.7%)   |
| yes                                   | 11,155        | (28%)      | 1,591          | (29.3%)   |
| Renal failure, n(%)                   |               |            |                |           |
| no                                    | 29,909        | (75%)      | 3,965          | (73.1%)   |
| yes                                   | 9,983         | (25%)      | 1,461          | (26.9%)   |
| Liver disease, n(%)                   |               |            |                |           |
| no                                    | 25,592        | (64.2%)    | 3,210          | (59.2%)   |
| yes                                   | 14,300        | (35.8%)    | 2,216          | (40.8%)   |
| Blood loss anemia, n(%)               |               |            |                |           |
| no                                    | 38,631        | (96.8%)    | 5,240          | (96.6%)   |
| yes                                   | 1,261         | (3.2%)     | 186            | (3.4%)    |
| Deficiency anemia, n(%)               |               |            |                |           |
| no                                    | 34,636        | (86.8%)    | 4,672          | (86.1%)   |
| yes                                   | 5,256         | (13.2%)    | 754            | (13.9%)   |
| Alcohol abuse, n(%)                   |               |            |                |           |
| no                                    | 36,279        | (90.9%)    | 4,922          | (90.7%)   |

|                                  |        |         |       |         |
|----------------------------------|--------|---------|-------|---------|
| yes                              | 3,613  | (9.1%)  | 504   | (9.3%)  |
| Drug abuse, n(%)                 |        |         |       |         |
| no                               | 38,849 | (97.4%) | 5,280 | (97.3%) |
| yes                              | 1,043  | (2.6%)  | 146   | (2.7%)  |
| Other oncological disease, n (%) |        |         |       |         |
| no                               | 25,743 | (64.5%) | 3,403 | (62.7%) |
| yes                              | 14,149 | (35.5%) | 2,023 | (37.3%) |
| Distant metastasis, n (%)        |        |         |       |         |
| no                               | 18,234 | (45.7%) | 2,799 | (51.6%) |
| yes                              | 21,658 | (54.3%) | 2,627 | (48.4%) |
| Resection, n (%)                 |        |         |       |         |
| no                               | 31,715 | (79.5%) | 3,432 | (63.3%) |
| yes                              | 8,177  | (20.5%) | 1,994 | (36.7%) |

---

7

8 Table S3: Full regression results (including Year of index treatment and Elixhauser comorbidities): Hazard ratios (HRs) and 95%-confidence intervals (CI) from Cox  
 9 regression with shared frailty

| Variable                                  | HR   | CI          | HR   | CI          | HR   | CI          | HR   | CI          |
|-------------------------------------------|------|-------------|------|-------------|------|-------------|------|-------------|
| Certified center (ref: no)                | -    | -           | -    | -           | -    | -           | -    | -           |
| yes                                       | 0.82 | (0.78,0.86) | 0.82 | (0.78,0.86) | 0.84 | (0.81,0.88) | 0.89 | (0.85,0.93) |
| Year of index treatment (ref: 2009)       | -    | -           | -    | -           | -    | -           | -    | -           |
| 2010                                      | 1.03 | (0.99,1.07) | 1.00 | (0.97,1.05) | 0.98 | (0.94,1.02) | 0.98 | (0.94,1.02) |
| 2011                                      | 1.01 | (0.97,1.05) | 0.99 | (0.95,1.03) | 0.96 | (0.92,1.00) | 0.95 | (0.92,0.99) |
| 2012                                      | 1.01 | (0.97,1.06) | 0.98 | (0.94,1.02) | 0.97 | (0.93,1.01) | 0.96 | (0.92,1.00) |
| 2013                                      | 1.04 | (1.00,1.09) | 1.00 | (0.95,1.04) | 0.97 | (0.93,1.01) | 0.96 | (0.92,1.00) |
| 2014                                      | 1.02 | (0.98,1.06) | 0.98 | (0.94,1.02) | 0.95 | (0.91,0.99) | 0.94 | (0.90,0.98) |
| 2015                                      | 1.02 | (0.97,1.06) | 0.96 | (0.92,1.00) | 0.91 | (0.87,0.95) | 0.90 | (0.86,0.94) |
| 2016                                      | 1.02 | (0.97,1.06) | 0.95 | (0.91,1.00) | 0.89 | (0.85,0.93) | 0.88 | (0.84,0.92) |
| 2017                                      | 1.02 | (0.97,1.07) | 0.94 | (0.89,0.99) | 0.88 | (0.84,0.93) | 0.87 | (0.83,0.92) |
| Age (ref: 18-59)                          | -    | -           | -    | -           | -    | -           | -    | -           |
| 60-79                                     |      |             | 1.43 | (1.38,1.48) | 1.47 | (1.42,1.52) | 1.46 | (1.41,1.51) |
| 80+                                       |      |             | 2.22 | (2.14,2.31) | 2.49 | (2.39,2.59) | 2.46 | (2.37,2.56) |
| Sex (ref: female)                         | -    | -           | -    | -           | -    | -           | -    | -           |
| male                                      |      |             | 1.05 | (1.03,1.07) | 1.04 | (1.02,1.06) | 1.04 | (1.02,1.06) |
| Congestive heart failure (ref: no)        | -    | -           | -    | -           | -    | -           | -    | -           |
| yes                                       |      |             | 1.15 | (1.12,1.18) | 1.15 | (1.13,1.18) | 1.15 | (1.12,1.18) |
| Cardiac arrhythmias (ref: no)             | -    | -           | -    | -           | -    | -           | -    | -           |
| yes                                       |      |             | 0.97 | (0.95,0.99) | 0.98 | (0.96,1.01) | 0.98 | (0.96,1.01) |
| Valvular disease (ref: no)                | -    | -           | -    | -           | -    | -           | -    | -           |
| yes                                       |      |             | 0.97 | (0.95,1.00) | 0.98 | (0.96,1.01) | 0.99 | (0.96,1.01) |
| Pulmonary circulation disorders (ref: no) | -    | -           | -    | -           | -    | -           | -    | -           |
| yes                                       |      |             | 1.24 | (1.20,1.29) | 1.18 | (1.14,1.22) | 1.18 | (1.14,1.22) |
| Periph. vascular disorders (ref: no)      | -    | -           | -    | -           | -    | -           | -    | -           |
| yes                                       |      |             | 1.07 | (1.04,1.09) | 1.06 | (1.04,1.08) | 1.06 | (1.04,1.08) |
| Hypertension, (uc) (ref: no)              | -    | -           | -    | -           | -    | -           | -    | -           |
| yes                                       |      |             | 0.98 | (0.95,1.01) | 1.01 | (0.98,1.04) | 1.00 | (0.97,1.04) |
| Hypertension, (c) (ref: no)               | -    | -           | -    | -           | -    | -           | -    | -           |
| yes                                       |      |             | 0.96 | (0.93,0.98) | 0.95 | (0.93,0.98) | 0.95 | (0.93,0.98) |

|                                        |   |   |      |             |      |             |      |             |
|----------------------------------------|---|---|------|-------------|------|-------------|------|-------------|
| Other neurological disorders (ref: no) | - | - | -    | -           | -    | -           | -    | -           |
| yes                                    |   |   | 1.16 | (1.13,1.20) | 1.18 | (1.15,1.22) | 1.18 | (1.15,1.22) |
| Chronic pulmonary disease (ref: no)    | - | - | -    | -           | -    | -           | -    | -           |
| yes                                    |   |   | 0.96 | (0.94,0.98) | 0.96 | (0.94,0.98) | 0.96 | (0.94,0.98) |
| Diabetes (uc) (ref: no)                | - | - | -    | -           | -    | -           | -    | -           |
| yes                                    |   |   | 0.97 | (0.95,1.00) | 0.99 | (0.97,1.02) | 0.99 | (0.97,1.02) |
| Diabetes (c) (ref: no)                 | - | - | -    | -           | -    | -           | -    | -           |
| yes                                    |   |   | 1.06 | (1.04,1.09) | 1.05 | (1.02,1.07) | 1.05 | (1.02,1.07) |
| Renal failure (ref: no)                | - | - | -    | -           | -    | -           | -    | -           |
| yes                                    |   |   | 1.12 | (1.09,1.15) | 1.15 | (1.12,1.18) | 1.15 | (1.12,1.18) |
| Liver disease (ref: no)                | - | - | -    | -           | -    | -           | -    | -           |
| yes                                    |   |   | 1.01 | (0.98,1.03) | 1.00 | (0.98,1.03) | 1.00 | (0.98,1.03) |
| Blood loss anemia (ref: no)            | - | - | -    | -           | -    | -           | -    | -           |
| yes                                    |   |   | 1.07 | (1.01,1.14) | 1.08 | (1.02,1.14) | 1.08 | (1.02,1.14) |
| Deficiency anemia (ref: no)            | - | - | -    | -           | -    | -           | -    | -           |
| yes                                    |   |   | 1.04 | (1.01,1.08) | 1.04 | (1.01,1.07) | 1.04 | (1.01,1.07) |
| Alcohol abuse (ref: no)                | - | - | -    | -           | -    | -           | -    | -           |
| yes                                    |   |   | 1.14 | (1.10,1.18) | 1.16 | (1.12,1.21) | 1.16 | (1.12,1.20) |
| Drug abuse (ref: no)                   | - | - | -    | -           | -    | -           | -    | -           |
| yes                                    |   |   | 1.00 | (0.94,1.06) | 1.06 | (1.00,1.13) | 1.06 | (1.00,1.13) |
| Other oncological disease (ref: no)    | - | - | -    | -           | -    | -           | -    | -           |
| yes                                    |   |   | 0.94 | (0.92,0.96) | 0.85 | (0.83,0.87) | 0.85 | (0.83,0.87) |
| Distant metastasis (ref: no)           | - | - | -    | -           | -    | -           | -    | -           |
| yes                                    |   |   |      |             | 2.33 | (2.28,2.38) | 2.31 | (2.27,2.36) |
| Hospital beds (ref: 1-299)             | - | - | -    | -           | -    | -           | -    | -           |
| 300-499                                |   |   |      |             |      |             | 0.95 | (0.92,0.99) |
| 500-999                                |   |   |      |             |      |             | 0.88 | (0.84,0.92) |
| 1000+                                  |   |   |      |             |      |             | 0.82 | (0.77,0.87) |
| Teaching hospital (ref: no)            | - | - | -    | -           | -    | -           | -    | -           |
| yes                                    |   |   |      |             |      |             | 0.96 | (0.93,0.99) |
| University hospital (ref: no)          | - | - | -    | -           | -    | -           | -    | -           |
| yes                                    |   |   |      |             |      |             | 0.81 | (0.74,0.88) |
| Hospital ownership (ref: public)       | - | - | -    | -           | -    | -           | -    | -           |



|                     |        |        |        |        |             |
|---------------------|--------|--------|--------|--------|-------------|
| non-profit          |        |        |        | 1.00   | (0.96,1.03) |
| private             |        |        |        | 1.01   | (0.97,1.05) |
| Number of patients  | 45,318 | 45,318 | 45,318 | 45,318 |             |
| Number of hospitals | 1,051  | 1,051  | 1,051  | 1,051  |             |
| SD(RE)              | 0.26   | 0.21   | 0.19   | 0.16   |             |

HR=Hazard ratio, CI=95%-confidence interval, SD(RE)=standard deviation of the random intercept.

10  
11

12 Table S4: Hazard ratios (HRs) and 95%-confidence intervals (CI) from Cox regression with shared frailty for different strata (Part 1)

| Subgroup<br>Variable                      | Certain insurance status |             | Sex          |             |            |             | Other oncological disease |             |
|-------------------------------------------|--------------------------|-------------|--------------|-------------|------------|-------------|---------------------------|-------------|
|                                           | yes<br>HR                | CI          | Female<br>HR | CI          | Male<br>HR | CI          | yes<br>HR                 | CI          |
| Certified center (ref: no)                | -                        | -           | -            | -           | -          | -           | -                         | -           |
| yes                                       | 0.88                     | (0.84,0.92) | 0.86         | (0.80,0.91) | 0.90       | (0.84,0.95) | 0.86                      | (0.80,0.92) |
| Year of index treatment (ref: 2009)       | -                        | -           | -            | -           | -          | -           | -                         | -           |
| 2010                                      | 0.98                     | (0.94,1.02) | 0.96         | (0.91,1.01) | 1.01       | (0.95,1.06) | 1.01                      | (0.95,1.09) |
| 2011                                      | 0.96                     | (0.92,1.00) | 0.94         | (0.88,0.99) | 0.97       | (0.91,1.03) | 0.99                      | (0.92,1.06) |
| 2012                                      | 0.96                     | (0.92,1.00) | 0.95         | (0.90,1.01) | 0.97       | (0.91,1.02) | 0.99                      | (0.92,1.06) |
| 2013                                      | 0.96                     | (0.92,1.00) | 0.93         | (0.87,0.98) | 1.00       | (0.94,1.06) | 0.96                      | (0.89,1.03) |
| 2014                                      | 0.95                     | (0.91,0.99) | 0.94         | (0.89,1.00) | 0.94       | (0.89,1.00) | 0.91                      | (0.85,0.97) |
| 2015                                      | 0.90                     | (0.87,0.94) | 0.91         | (0.86,0.96) | 0.89       | (0.84,0.95) | 0.90                      | (0.84,0.97) |
| 2016                                      | 0.88                     | (0.85,0.93) | 0.87         | (0.82,0.93) | 0.89       | (0.84,0.95) | 0.87                      | (0.81,0.94) |
| 2017                                      | 0.87                     | (0.83,0.92) | 0.89         | (0.83,0.95) | 0.86       | (0.80,0.92) | 0.91                      | (0.84,0.99) |
| Age (ref: 18-59)                          | -                        | -           | -            | -           | -          | -           | -                         | -           |
| 60-79                                     | 1.44                     | (1.39,1.49) | 1.48         | (1.40,1.56) | 1.45       | (1.39,1.52) | 1.41                      | (1.32,1.50) |
| 80+                                       | 2.43                     | (2.33,2.53) | 2.58         | (2.43,2.74) | 2.34       | (2.21,2.47) | 2.28                      | (2.12,2.44) |
| Sex (ref: female)                         | -                        | -           | -            | -           | -          | -           | -                         | -           |
| male                                      | 1.04                     | (1.02,1.06) |              |             |            |             | 1.07                      | (1.03,1.11) |
| Congestive heart failure (ref: no)        | -                        | -           | -            | -           | -          | -           | -                         | -           |
| yes                                       | 1.15                     | (1.12,1.18) | 1.16         | (1.12,1.20) | 1.13       | (1.09,1.17) | 1.15                      | (1.10,1.19) |
| Cardiac arrhythmias (ref: no)             | -                        | -           | -            | -           | -          | -           | -                         | -           |
| yes                                       | 0.98                     | (0.96,1.01) | 0.98         | (0.95,1.01) | 1.00       | (0.96,1.03) | 0.98                      | (0.95,1.02) |
| Valvular disease (ref: no)                | -                        | -           | -            | -           | -          | -           | -                         | -           |
| yes                                       | 0.98                     | (0.96,1.01) | 0.96         | (0.92,0.99) | 1.02       | (0.98,1.07) | 1.01                      | (0.97,1.06) |
| Pulmonary circulation disorders (ref: no) | -                        | -           | -            | -           | -          | -           | -                         | -           |
| yes                                       | 1.17                     | (1.13,1.22) | 1.17         | (1.12,1.23) | 1.19       | (1.13,1.25) | 1.13                      | (1.07,1.20) |
| Periph. vascular disorders (ref: no)      | -                        | -           | -            | -           | -          | -           | -                         | -           |
| yes                                       | 1.06                     | (1.03,1.08) | 1.04         | (1.01,1.07) | 1.08       | (1.04,1.11) | 1.06                      | (1.03,1.10) |
| Hypertension, (uc) (ref: no)              | -                        | -           | -            | -           | -          | -           | -                         | -           |

|                                        |      |             |      |             |      |             |      |             |
|----------------------------------------|------|-------------|------|-------------|------|-------------|------|-------------|
| yes                                    | 1.00 | (0.97,1.03) | 1.00 | (0.96,1.05) | 1.00 | (0.96,1.05) | 1.06 | (1.00,1.11) |
| Hypertension, (c) (ref: no)            | -    | -           | -    | -           | -    | -           | -    | -           |
| yes                                    | 0.96 | (0.93,0.98) | 0.96 | (0.93,1.00) | 0.95 | (0.91,0.99) | 0.96 | (0.92,1.00) |
| Other neurological disorders (ref: no) | -    | -           | -    | -           | -    | -           | -    | -           |
| yes                                    | 1.19 | (1.15,1.22) | 1.15 | (1.10,1.20) | 1.22 | (1.17,1.28) | 1.20 | (1.14,1.26) |
| Chronic pulmonary disease (ref: no)    | -    | -           | -    | -           | -    | -           | -    | -           |
| yes                                    | 0.97 | (0.95,0.99) | 0.93 | (0.91,0.96) | 1.00 | (0.97,1.03) | 0.99 | (0.96,1.03) |
| Diabetes (uc) (ref: no)                | -    | -           | -    | -           | -    | -           | -    | -           |
| yes                                    | 0.99 | (0.97,1.02) | 1.02 | (0.99,1.06) | 0.97 | (0.93,1.00) | 1.01 | (0.97,1.05) |
| Diabetes (c) (ref: no)                 | -    | -           | -    | -           | -    | -           | -    | -           |
| yes                                    | 1.04 | (1.02,1.07) | 1.03 | (0.99,1.07) | 1.06 | (1.02,1.10) | 1.03 | (0.99,1.08) |
| Renal failure (ref: no)                | -    | -           | -    | -           | -    | -           | -    | -           |
| yes                                    | 1.15 | (1.12,1.18) | 1.16 | (1.12,1.20) | 1.13 | (1.09,1.18) | 1.14 | (1.09,1.19) |
| Liver disease (ref: no)                | -    | -           | -    | -           | -    | -           | -    | -           |
| yes                                    | 1.01 | (0.98,1.03) | 0.99 | (0.96,1.02) | 1.02 | (0.99,1.05) | 1.00 | (0.97,1.04) |
| Blood loss anemia (ref: no)            | -    | -           | -    | -           | -    | -           | -    | -           |
| yes                                    | 1.08 | (1.02,1.14) | 1.10 | (1.02,1.19) | 1.04 | (0.95,1.14) | 1.01 | (0.93,1.11) |
| Deficiency anemia (ref: no)            | -    | -           | -    | -           | -    | -           | -    | -           |
| yes                                    | 1.04 | (1.01,1.08) | 1.04 | (1.00,1.09) | 1.03 | (0.99,1.08) | 1.03 | (0.98,1.08) |
| Alcohol abuse (ref: no)                | -    | -           | -    | -           | -    | -           | -    | -           |
| yes                                    | 1.16 | (1.12,1.21) | 1.21 | (1.13,1.31) | 1.14 | (1.09,1.19) | 1.19 | (1.12,1.27) |
| Drug abuse (ref: no)                   | -    | -           | -    | -           | -    | -           | -    | -           |
| yes                                    | 1.06 | (1.00,1.13) | 1.10 | (1.01,1.19) | 1.04 | (0.94,1.14) | 1.12 | (1.01,1.24) |
| Other oncological disease (ref: no)    | -    | -           | -    | -           | -    | -           | -    | -           |
| yes                                    | 0.85 | (0.83,0.87) | 0.83 | (0.81,0.86) | 0.87 | (0.85,0.90) |      |             |
| Distant metastasis (ref: no)           | -    | -           | -    | -           | -    | -           | -    | -           |
| yes                                    | 2.29 | (2.24,2.34) | 2.30 | (2.23,2.37) | 2.36 | (2.29,2.44) | 2.12 | (2.05,2.20) |
| Hospital beds (ref: 1-299)             | -    | -           | -    | -           | -    | -           | -    | -           |
| 300-499                                | 0.95 | (0.92,0.99) | 0.96 | (0.91,1.00) | 0.96 | (0.91,1.01) | 0.98 | (0.92,1.03) |
| 500-999                                | 0.88 | (0.84,0.92) | 0.87 | (0.83,0.92) | 0.89 | (0.84,0.94) | 0.87 | (0.81,0.93) |
| 1000+                                  | 0.82 | (0.77,0.88) | 0.80 | (0.74,0.87) | 0.83 | (0.77,0.89) | 0.77 | (0.70,0.84) |
| Teaching hospital (ref: no)            | -    | -           | -    | -           | -    | -           | -    | -           |

|                                  |        |             |        |             |        |             |        |             |
|----------------------------------|--------|-------------|--------|-------------|--------|-------------|--------|-------------|
| yes                              | 0.95   | (0.92,0.98) | 0.95   | (0.91,1.00) | 0.95   | (0.91,1.00) | 0.94   | (0.90,0.99) |
| University hospital (ref: no)    | -      | -           | -      | -           | -      | -           | -      | -           |
| yes                              | 0.80   | (0.73,0.87) | 0.82   | (0.74,0.91) | 0.80   | (0.73,0.88) | 0.81   | (0.72,0.91) |
| Hospital ownership (ref: public) | -      | -           | -      | -           | -      | -           | -      | -           |
| non-profit                       | 0.99   | (0.96,1.03) | 0.98   | (0.94,1.03) | 1.01   | (0.96,1.05) | 0.96   | (0.91,1.01) |
| private                          | 1.00   | (0.96,1.05) | 1.01   | (0.96,1.07) | 1.00   | (0.94,1.05) | 0.97   | (0.91,1.04) |
| Number of patients               | 43,586 |             | 23,613 |             | 21,705 |             | 16,172 |             |
| Number of hospitals              | 1,050  |             | 1,019  |             | 1,014  |             | 1,005  |             |
| SD(RE)                           | 0.16   |             | 0.16   |             | 0.14   |             | 0.19   |             |

13

14 Table S4: Hazard ratios (HRs) and 95%-confidence intervals (CI) from Cox regression with shared frailty for different strata (Part 2)

| Subgroup                                  | Distance metastasis |             |           |             |          |             | Resection |             |          |             |
|-------------------------------------------|---------------------|-------------|-----------|-------------|----------|-------------|-----------|-------------|----------|-------------|
|                                           | no<br>HR            | CI          | yes<br>HR | CI          | no<br>HR | CI          | yes<br>HR | CI          | no<br>HR | CI          |
| Certified center (ref: no)                | -                   | -           | -         | -           | -        | -           | -         | -           | -        | -           |
| yes                                       | 0.90                | (0.85,0.95) | 0.89      | (0.84,0.94) | 0.86     | (0.81,0.92) | 0.92      | (0.86,0.99) | 0.93     | (0.88,0.97) |
| Year of index treatment (ref: 2009)       | -                   | -           | -         | -           | -        | -           | -         | -           | -        | -           |
| 2010                                      | 0.96                | (0.91,1.01) | 0.95      | (0.90,1.00) | 1.01     | (0.95,1.07) | 1.00      | (0.91,1.10) | 1.00     | (0.95,1.04) |
| 2011                                      | 0.93                | (0.88,0.98) | 0.94      | (0.89,0.99) | 0.98     | (0.92,1.04) | 0.95      | (0.87,1.04) | 1.00     | (0.96,1.04) |
| 2012                                      | 0.94                | (0.89,0.99) | 0.96      | (0.91,1.02) | 0.96     | (0.90,1.01) | 0.96      | (0.88,1.06) | 0.99     | (0.94,1.03) |
| 2013                                      | 0.96                | (0.91,1.01) | 0.97      | (0.91,1.02) | 0.95     | (0.89,1.01) | 0.95      | (0.86,1.05) | 1.00     | (0.96,1.05) |
| 2014                                      | 0.96                | (0.91,1.01) | 0.95      | (0.90,1.01) | 0.91     | (0.86,0.97) | 0.96      | (0.87,1.06) | 0.97     | (0.92,1.01) |
| 2015                                      | 0.89                | (0.85,0.94) | 0.90      | (0.85,0.96) | 0.89     | (0.83,0.95) | 0.85      | (0.77,0.94) | 0.95     | (0.91,1.00) |
| 2016                                      | 0.88                | (0.83,0.93) | 0.85      | (0.80,0.90) | 0.93     | (0.87,1.00) | 0.91      | (0.82,1.02) | 0.91     | (0.87,0.96) |
| 2017                                      | 0.84                | (0.79,0.90) | 0.88      | (0.83,0.94) | 0.85     | (0.79,0.93) | 0.85      | (0.74,0.99) | 0.92     | (0.87,0.97) |
| Age (ref: 18-59)                          | -                   | -           | -         | -           | -        | -           | -         | -           | -        | -           |
| 60-79                                     | 1.48                | (1.42,1.55) | 1.36      | (1.31,1.42) | 1.63     | (1.54,1.72) | 1.42      | (1.32,1.52) | 1.44     | (1.38,1.50) |
| 80+                                       | 2.59                | (2.47,2.72) | 2.18      | (2.07,2.29) | 2.97     | (2.79,3.17) | 1.99      | (1.81,2.19) | 2.22     | (2.12,2.32) |
| Sex (ref: female)                         | -                   | -           | -         | -           | -        | -           | -         | -           | -        | -           |
| male                                      | 1.02                | (0.99,1.05) | 1.04      | (1.01,1.07) | 1.03     | (1.00,1.07) | 1.09      | (1.04,1.15) | 1.03     | (1.00,1.05) |
| Congestive heart failure (ref: no)        | -                   | -           | -         | -           | -        | -           | -         | -           | -        | -           |
| yes                                       | 1.16                | (1.12,1.19) | 1.12      | (1.08,1.15) | 1.20     | (1.15,1.24) | 1.11      | (1.04,1.17) | 1.14     | (1.11,1.17) |
| Cardiac arrhythmias (ref: no)             | -                   | -           | -         | -           | -        | -           | -         | -           | -        | -           |
| yes                                       | 0.98                | (0.96,1.01) | 0.99      | (0.96,1.02) | 0.99     | (0.95,1.02) | 0.99      | (0.94,1.05) | 0.99     | (0.97,1.02) |
| Valvular disease (ref: no)                | -                   | -           | -         | -           | -        | -           | -         | -           | -        | -           |
| yes                                       | 0.96                | (0.93,1.00) | 0.99      | (0.96,1.03) | 0.97     | (0.93,1.01) | 1.00      | (0.93,1.06) | 0.99     | (0.96,1.02) |
| Pulmonary circulation disorders (ref: no) | -                   | -           | -         | -           | -        | -           | -         | -           | -        | -           |
| yes                                       | 1.21                | (1.16,1.27) | 1.20      | (1.15,1.26) | 1.16     | (1.09,1.23) | 1.09      | (0.98,1.20) | 1.18     | (1.13,1.23) |

|                                        |      |             |      |             |      |             |      |             |      |             |
|----------------------------------------|------|-------------|------|-------------|------|-------------|------|-------------|------|-------------|
| Periph. vascular disorders (ref: no)   | -    | -           | -    | -           | -    | -           | -    | -           | -    |             |
| yes                                    | 1.06 | (1.03,1.09) | 1.05 | (1.02,1.08) | 1.07 | (1.03,1.11) | 1.08 | (1.02,1.14) | 1.05 | (1.02,1.07) |
| Hypertension, (uc) (ref: no)           | -    | -           | -    | -           | -    | -           | -    | -           | -    |             |
| yes                                    | 0.98 | (0.94,1.01) | 1.04 | (1.00,1.08) | 0.96 | (0.91,1.00) | 1.00 | (0.94,1.07) | 0.99 | (0.96,1.03) |
| Hypertension, (c) (ref: no)            | -    | -           | -    | -           | -    | -           | -    | -           | -    |             |
| yes                                    | 0.95 | (0.92,0.98) | 0.96 | (0.93,0.99) | 0.95 | (0.92,0.99) | 1.07 | (1.00,1.13) | 0.93 | (0.91,0.96) |
| Other neurological disorders (ref: no) | -    | -           | -    | -           | -    | -           | -    | -           | -    |             |
| yes                                    | 1.18 | (1.13,1.22) | 1.17 | (1.12,1.22) | 1.21 | (1.16,1.27) | 1.12 | (1.02,1.22) | 1.16 | (1.12,1.20) |
| Chronic pulmonary disease (ref: no)    | -    | -           | -    | -           | -    | -           | -    | -           | -    |             |
| yes                                    | 0.95 | (0.92,0.97) | 0.97 | (0.94,0.99) | 0.96 | (0.93,0.99) | 0.99 | (0.95,1.04) | 0.96 | (0.93,0.98) |
| Diabetes (uc) (ref: no)                | -    | -           | -    | -           | -    | -           | -    | -           | -    |             |
| yes                                    | 0.99 | (0.96,1.02) | 0.97 | (0.94,1.01) | 1.02 | (0.98,1.06) | 1.11 | (1.05,1.17) | 0.99 | (0.97,1.02) |
| Diabetes (c) (ref: no)                 | -    | -           | -    | -           | -    | -           | -    | -           | -    |             |
| yes                                    | 1.06 | (1.02,1.09) | 1.03 | (0.99,1.06) | 1.08 | (1.03,1.12) | 0.97 | (0.92,1.04) | 1.04 | (1.01,1.07) |
| Renal failure (ref: no)                | -    | -           | -    | -           | -    | -           | -    | -           | -    |             |
| yes                                    | 1.15 | (1.11,1.19) | 1.15 | (1.11,1.18) | 1.16 | (1.12,1.20) | 1.14 | (1.07,1.21) | 1.15 | (1.12,1.19) |
| Liver disease (ref: no)                | -    | -           | -    | -           | -    | -           | -    | -           | -    |             |
| yes                                    | 1.01 | (0.98,1.03) | 1.01 | (0.98,1.04) | 1.00 | (0.97,1.03) | 1.08 | (1.03,1.14) | 0.99 | (0.96,1.01) |
| Blood loss anemia (ref: no)            | -    | -           | -    | -           | -    | -           | -    | -           | -    |             |
| yes                                    | 1.13 | (1.05,1.22) | 1.05 | (0.97,1.14) | 1.11 | (1.02,1.21) | 1.19 | (1.03,1.37) | 1.05 | (0.98,1.12) |
| Deficiency anemia (ref: no)            | -    | -           | -    | -           | -    | -           | -    | -           | -    |             |
| yes                                    | 1.05 | (1.01,1.09) | 1.04 | (0.99,1.08) | 1.05 | (1.00,1.10) | 0.99 | (0.91,1.07) | 1.05 | (1.01,1.08) |
| Alcohol abuse (ref: no)                | -    | -           | -    | -           | -    | -           | -    | -           | -    |             |
| yes                                    | 1.15 | (1.10,1.20) | 1.19 | (1.13,1.24) | 1.14 | (1.07,1.21) | 1.17 | (1.07,1.27) | 1.14 | (1.10,1.19) |
| Drug abuse (ref: no)                   | -    | -           | -    | -           | -    | -           | -    | -           | -    |             |
| yes                                    | 1.02 | (0.95,1.11) | 1.09 | (1.00,1.19) | 1.03 | (0.94,1.13) | 1.04 | (0.91,1.19) | 1.10 | (1.02,1.18) |
| Other oncological disease (ref: no)    | -    | -           | -    | -           | -    | -           | -    | -           | -    |             |
| yes                                    |      |             | 0.82 | (0.80,0.84) | 0.91 | (0.88,0.94) | 0.88 | (0.84,0.93) | 0.87 | (0.85,0.89) |
| Distant metastasis (ref: no)           | -    | -           | -    | -           | -    | -           | -    | -           | -    |             |

|                                  |        |             |        |             |        |             |        |             |        |             |
|----------------------------------|--------|-------------|--------|-------------|--------|-------------|--------|-------------|--------|-------------|
| yes                              | 2.45   | (2.39,2.52) | -      | -           | -      | -           | 1.45   | (1.36,1.55) | 1.92   | (1.87,1.97) |
| Hospital beds (ref: 1-299)       | -      | -           | -      | -           | -      | -           | -      | -           | -      | -           |
| 300-499                          | 0.94   | (0.90,0.98) | 0.96   | (0.91,1.00) | 0.96   | (0.91,1.01) | 0.95   | (0.87,1.04) | 1.01   | (0.97,1.04) |
| 500-999                          | 0.89   | (0.84,0.93) | 0.87   | (0.83,0.92) | 0.90   | (0.84,0.96) | 0.90   | (0.82,0.99) | 0.95   | (0.91,1.00) |
| 1000+                            | 0.85   | (0.78,0.92) | 0.81   | (0.75,0.87) | 0.83   | (0.76,0.91) | 0.87   | (0.79,0.97) | 0.92   | (0.87,0.98) |
| Teaching hospital (ref: no)      | -      | -           | -      | -           | -      | -           | -      | -           | -      | -           |
| yes                              | 0.96   | (0.92,1.00) | 0.96   | (0.92,1.00) | 0.95   | (0.90,1.00) | 0.97   | (0.90,1.04) | 1.00   | (0.96,1.03) |
| University hospital (ref: no)    | -      | -           | -      | -           | -      | -           | -      | -           | -      | -           |
| yes                              | 0.81   | (0.73,0.89) | 0.78   | (0.70,0.86) | 0.85   | (0.77,0.95) | 0.95   | (0.87,1.04) | 0.82   | (0.76,0.89) |
| Hospital ownership (ref: public) | -      | -           | -      | -           | -      | -           | -      | -           | -      | -           |
| non-profit                       | 1.02   | (0.98,1.06) | 0.99   | (0.95,1.03) | 1.01   | (0.97,1.06) | 1.05   | (0.99,1.12) | 0.99   | (0.96,1.03) |
| private                          | 1.03   | (0.98,1.08) | 1.03   | (0.98,1.08) | 0.98   | (0.92,1.03) | 1.10   | (1.02,1.19) | 0.98   | (0.95,1.03) |
| Number of patients               | 29,146 |             | 24,285 |             | 21,033 |             | 10,171 |             | 35,147 |             |
| Number of hospitals              | 1,027  |             | 1,027  |             | 1,002  |             | 597    |             | 1,049  |             |
| SD(RE)                           | 0.18   |             | 0.15   |             | 0.17   |             | 0.07   |             | 0.13   |             |

15

16 Table S4: Hazard ratios (HRs) and 95%-confidence intervals (CI) from Cox regression with shared frailty for different strata (Part 3)

| Subgroup                            | Single location |             |      |             | Hospital beds |             |             |             |
|-------------------------------------|-----------------|-------------|------|-------------|---------------|-------------|-------------|-------------|
|                                     | yes             |             | no   |             | Less than 500 |             | 500 or more |             |
| Variable                            | HR              | CI          | HR   | CI          | HR            | CI          | HR          | CI          |
| Certified center (ref: no)          | -               | -           | -    | -           | -             | -           | -           | -           |
| yes                                 | 0.90            | (0.85,0.95) | 0.80 | (0.72,0.88) | 0.93          | (0.84,1.03) | 0.90        | (0.85,0.95) |
| Year of index treatment (ref: 2009) | -               | -           | -    | -           | -             | -           | -           | -           |
| 2010                                | 0.98            | (0.94,1.02) | 0.96 | (0.86,1.08) | 1.00          | (0.95,1.06) | 0.95        | (0.89,1.01) |
| 2011                                | 0.95            | (0.91,0.99) | 0.99 | (0.89,1.10) | 0.95          | (0.91,1.01) | 0.95        | (0.89,1.01) |
| 2012                                | 0.95            | (0.91,0.99) | 1.00 | (0.90,1.11) | 0.98          | (0.93,1.04) | 0.93        | (0.87,0.99) |
| 2013                                | 0.97            | (0.92,1.01) | 0.93 | (0.84,1.03) | 0.99          | (0.94,1.04) | 0.92        | (0.86,0.98) |
| 2014                                | 0.94            | (0.89,0.98) | 0.94 | (0.85,1.04) | 0.98          | (0.92,1.03) | 0.89        | (0.84,0.95) |
| 2015                                | 0.90            | (0.86,0.94) | 0.89 | (0.80,0.99) | 0.93          | (0.88,0.99) | 0.86        | (0.80,0.92) |
| 2016                                | 0.88            | (0.84,0.93) | 0.87 | (0.78,0.96) | 0.91          | (0.86,0.97) | 0.84        | (0.79,0.90) |
| 2017                                | 0.87            | (0.82,0.92) | 0.87 | (0.78,0.98) | 0.91          | (0.86,0.97) | 0.82        | (0.76,0.89) |
| Age (ref: 18-59)                    | -               | -           | -    | -           | -             | -           | -           | -           |

|                                           |      |             |      |             |      |             |      |             |
|-------------------------------------------|------|-------------|------|-------------|------|-------------|------|-------------|
| 60-79                                     | 1.45 | (1.40,1.51) | 1.51 | (1.40,1.63) | 1.49 | (1.42,1.57) | 1.43 | (1.36,1.50) |
| 80+                                       | 2.43 | (2.32,2.54) | 2.61 | (2.39,2.85) | 2.44 | (2.31,2.57) | 2.53 | (2.38,2.68) |
| Sex (ref: female)                         | -    | -           | -    | -           | -    | -           | -    | -           |
| male                                      | 1.03 | (1.01,1.06) | 1.06 | (1.01,1.11) | 1.02 | (1.00,1.05) | 1.06 | (1.03,1.09) |
| Congestive heart failure (ref: no)        | -    | -           | -    | -           | -    | -           | -    | -           |
| yes                                       | 1.14 | (1.11,1.17) | 1.18 | (1.12,1.25) | 1.15 | (1.11,1.19) | 1.15 | (1.11,1.20) |
| Cardiac arrhythmias (ref: no)             | -    | -           | -    | -           | -    | -           | -    | -           |
| yes                                       | 0.99 | (0.96,1.01) | 0.98 | (0.93,1.02) | 0.99 | (0.96,1.01) | 0.98 | (0.95,1.02) |
| Valvular disease (ref: no)                | -    | -           | -    | -           | -    | -           | -    | -           |
| yes                                       | 0.98 | (0.95,1.01) | 0.99 | (0.94,1.05) | 1.00 | (0.97,1.04) | 0.96 | (0.92,1.00) |
| Pulmonary circulation disorders (ref: no) | -    | -           | -    | -           | -    | -           | -    | -           |
| yes                                       | 1.18 | (1.13,1.23) | 1.16 | (1.08,1.25) | 1.15 | (1.10,1.21) | 1.22 | (1.15,1.29) |
| Periph. vascular disorders (ref: no)      | -    | -           | -    | -           | -    | -           | -    | -           |
| yes                                       | 1.07 | (1.04,1.09) | 1.03 | (0.99,1.09) | 1.04 | (1.01,1.07) | 1.09 | (1.05,1.13) |
| Hypertension, (uc) (ref: no)              | -    | -           | -    | -           | -    | -           | -    | -           |
| yes                                       | 1.01 | (0.98,1.05) | 0.98 | (0.91,1.04) | 0.99 | (0.95,1.03) | 1.02 | (0.97,1.06) |
| Hypertension, (c) (ref: no)               | -    | -           | -    | -           | -    | -           | -    | -           |
| yes                                       | 0.96 | (0.93,0.99) | 0.93 | (0.88,0.98) | 0.95 | (0.92,0.99) | 0.96 | (0.92,0.99) |
| Other neurological disorders (ref: no)    | -    | -           | -    | -           | -    | -           | -    | -           |
| yes                                       | 1.17 | (1.13,1.21) | 1.23 | (1.15,1.31) | 1.22 | (1.17,1.27) | 1.13 | (1.07,1.18) |
| Chronic pulmonary disease (ref: no)       | -    | -           | -    | -           | -    | -           | -    | -           |
| yes                                       | 0.97 | (0.94,0.99) | 0.96 | (0.91,1.00) | 0.96 | (0.94,0.99) | 0.96 | (0.93,0.99) |
| Diabetes (uc) (ref: no)                   | -    | -           | -    | -           | -    | -           | -    | -           |
| yes                                       | 1.00 | (0.98,1.03) | 0.95 | (0.90,1.01) | 0.99 | (0.96,1.03) | 0.99 | (0.96,1.03) |
| Diabetes (c) (ref: no)                    | -    | -           | -    | -           | -    | -           | -    | -           |
| yes                                       | 1.03 | (1.00,1.07) | 1.09 | (1.03,1.16) | 1.05 | (1.01,1.09) | 1.04 | (1.00,1.09) |
| Renal failure (ref: no)                   | -    | -           | -    | -           | -    | -           | -    | -           |
| yes                                       | 1.15 | (1.12,1.19) | 1.14 | (1.08,1.20) | 1.13 | (1.10,1.17) | 1.17 | (1.12,1.21) |
| Liver disease (ref: no)                   | -    | -           | -    | -           | -    | -           | -    | -           |
| yes                                       | 1.02 | (0.99,1.04) | 0.95 | (0.91,1.00) | 0.98 | (0.95,1.01) | 1.04 | (1.00,1.07) |
| Blood loss anemia (ref: no)               | -    | -           | -    | -           | -    | -           | -    | -           |
| yes                                       | 1.07 | (1.00,1.14) | 1.12 | (0.99,1.27) | 1.11 | (1.03,1.20) | 1.04 | (0.95,1.14) |
| Deficiency anemia (ref: no)               | -    | -           | -    | -           | -    | -           | -    | -           |



|                                     |        |             |       |             |        |             |        |             |
|-------------------------------------|--------|-------------|-------|-------------|--------|-------------|--------|-------------|
| yes                                 | 1.04   | (1.01,1.08) | 1.02  | (0.95,1.09) | 1.03   | (0.99,1.08) | 1.04   | (0.99,1.09) |
| Alcohol abuse (ref: no)             | -      | -           | -     | -           | -      | -           | -      | -           |
| yes                                 | 1.17   | (1.12,1.22) | 1.12  | (1.04,1.22) | 1.14   | (1.08,1.20) | 1.19   | (1.13,1.26) |
| Drug abuse (ref: no)                | -      | -           | -     | -           | -      | -           | -      | -           |
| yes                                 | 1.07   | (1.00,1.15) | 1.03  | (0.91,1.18) | 1.02   | (0.94,1.11) | 1.13   | (1.03,1.24) |
| Other oncological disease (ref: no) | -      | -           | -     | -           | -      | -           | -      | -           |
| yes                                 | 0.86   | (0.84,0.88) | 0.83  | (0.79,0.87) | 0.87   | (0.85,0.90) | 0.82   | (0.80,0.85) |
| Distant metastasis (ref: no)        | -      | -           | -     | -           | -      | -           | -      | -           |
| yes                                 | 2.31   | (2.25,2.36) | 2.35  | (2.24,2.46) | 2.25   | (2.19,2.32) | 2.39   | (2.31,2.47) |
| Hospital beds (ref: 1-299)          | -      | -           | -     | -           | -      | -           | -      | -           |
| 300-499                             | 0.94   | (0.90,0.98) | 1.00  | (0.92,1.08) |        |             |        |             |
| 500-999                             | 0.87   | (0.83,0.91) | 0.90  | (0.82,0.99) |        |             |        |             |
| 1000+                               | 0.80   | (0.74,0.86) | 0.91  | (0.78,1.05) |        |             |        |             |
| Teaching hospital (ref: no)         | -      | -           | -     | -           | -      | -           | -      | -           |
| yes                                 | 0.96   | (0.92,0.99) | 0.96  | (0.88,1.04) | 0.92   | (0.89,0.95) | 1.04   | (0.96,1.12) |
| University hospital (ref: no)       | -      | -           | -     | -           | -      | -           | -      | -           |
| yes                                 | 0.82   | (0.74,0.89) | 1.03  | (0.80,1.31) | 0.80   | (0.62,1.03) | 0.80   | (0.73,0.88) |
| Hospital ownership (ref: public)    | -      | -           | -     | -           | -      | -           | -      | -           |
| non-profit                          | 1.00   | (0.97,1.04) | 0.97  | (0.91,1.04) | 0.99   | (0.95,1.02) | 1.05   | (0.98,1.12) |
| private                             | 1.02   | (0.97,1.07) | 0.94  | (0.85,1.04) | 1.02   | (0.97,1.07) | 1.02   | (0.94,1.10) |
| Number of patients                  | 35,547 |             | 9,771 |             | 25,333 |             | 19,985 |             |
| Number of hospitals                 | 983    |             | 223   |             | 860    |             | 235    |             |
| SD(RE)                              | 0.16   |             | 0.13  |             | 0.14   |             | 0.18   |             |

HR=Hazard ratio, CI=95%-confidence interval, SD(RE)=standard deviation of the random intercept.

17  
18

19 Table S5: Number and share of patients treated in GCS-certified cancer centers by continuity of  
20 certification

| Variable                           | Certified: yes (n=5,426) |         |
|------------------------------------|--------------------------|---------|
| Continuity of certification, n (%) |                          |         |
| <1 year                            | 1,335                    | (24.6%) |
| 1-<2 years                         | 1,146                    | (21.1%) |
| 2-<5 years                         | 2,270                    | (41.8%) |
| 5 or more years                    | 675                      | (12.4%) |

21

22 Table S6: Hazard ratios (HRs) and 95%-confidence intervals (CI) from Cox regression with shared frailty  
 23 for continuity of GCS-certification

| Variable                                         | HR   | CI          |
|--------------------------------------------------|------|-------------|
| Continuity of certification (ref: not certified) | -    | -           |
| <1 year                                          | 0.91 | (0.85,0.97) |
| 1-<2 years                                       | 0.87 | (0.81,0.94) |
| 2-<5 years                                       | 0.89 | (0.84,0.95) |
| 5 or more years                                  | 0.77 | (0.68,0.87) |
| Year of index treatment (ref: 2009)              | -    | -           |
| 2010                                             | 0.98 | (0.94,1.02) |
| 2011                                             | 0.95 | (0.91,0.99) |
| 2012                                             | 0.96 | (0.92,1.00) |
| 2013                                             | 0.96 | (0.92,1.00) |
| 2014                                             | 0.94 | (0.90,0.98) |
| 2015                                             | 0.90 | (0.86,0.94) |
| 2016                                             | 0.88 | (0.84,0.92) |
| 2017                                             | 0.88 | (0.84,0.92) |
| Age (ref: 18-59)                                 | -    | -           |
| 60-79                                            | 1.46 | (1.41,1.51) |
| 80+                                              | 2.46 | (2.37,2.56) |
| Sex (ref: female)                                | -    | -           |
| male                                             | 1.04 | (1.02,1.06) |
| Congestive heart failure (ref: no)               | -    | -           |
| yes                                              | 1.15 | (1.12,1.18) |
| Cardiac arrhythmias (ref: no)                    | -    | -           |
| yes                                              | 0.98 | (0.96,1.01) |
| Valvular disease (ref: no)                       | -    | -           |
| yes                                              | 0.99 | (0.96,1.01) |
| Pulmonary circulation disorders (ref: no)        | -    | -           |
| yes                                              | 1.18 | (1.14,1.22) |
| Periph. vascular disorders (ref: no)             | -    | -           |
| yes                                              | 1.06 | (1.04,1.08) |
| Hypertension, (uc) (ref: no)                     | -    | -           |
| yes                                              | 1.00 | (0.97,1.04) |
| Hypertension, (c) (ref: no)                      | -    | -           |
| yes                                              | 0.95 | (0.93,0.98) |
| Other neurological disorders (ref: no)           | -    | -           |
| yes                                              | 1.18 | (1.15,1.22) |
| Chronic pulmonary disease (ref: no)              | -    | -           |
| yes                                              | 0.96 | (0.94,0.98) |
| Diabetes (uc) (ref: no)                          | -    | -           |
| yes                                              | 0.99 | (0.97,1.02) |
| Diabetes (c) (ref: no)                           | -    | -           |
| yes                                              | 1.05 | (1.02,1.07) |
| Renal failure (ref: no)                          | -    | -           |
| yes                                              | 1.15 | (1.12,1.18) |
| Liver disease (ref: no)                          | -    | -           |
| yes                                              | 1.00 | (0.98,1.03) |
| Blood loss anemia (ref: no)                      | -    | -           |
| yes                                              | 1.08 | (1.02,1.14) |
| Deficiency anemia (ref: no)                      | -    | -           |
| yes                                              | 1.04 | (1.01,1.07) |
| Alcohol abuse (ref: no)                          | -    | -           |

|                                     |        |             |
|-------------------------------------|--------|-------------|
| yes                                 | 1.16   | (1.12,1.20) |
| Drug abuse (ref: no)                | -      | -           |
| yes                                 | 1.06   | (1.00,1.13) |
| Other oncological disease (ref: no) | -      | -           |
| yes                                 | 0.85   | (0.83,0.87) |
| Distant metastasis (ref: no)        | -      | -           |
| yes                                 | 2.32   | (2.27,2.37) |
| Hospital beds (ref: 1-299)          | -      | -           |
| 300-499                             | 0.95   | (0.92,0.99) |
| 500-999                             | 0.88   | (0.84,0.92) |
| 1000+                               | 0.82   | (0.77,0.87) |
| Teaching hospital (ref: no)         | -      | -           |
| yes                                 | 0.96   | (0.93,0.99) |
| University hospital (ref: no)       | -      | -           |
| yes                                 | 0.81   | (0.74,0.88) |
| Hospital ownership (ref: public)    | -      | -           |
| non-profit                          | 1.00   | (0.96,1.03) |
| private                             | 1.01   | (0.97,1.05) |
| <hr/>                               |        |             |
| Number of patients                  | 45,318 |             |
| Number of hospitals                 | 1,051  |             |
| SD(RE)                              | 0.16   |             |

HR=Hazard ratio, CI=95%-confidence interval, SD(RE)=standard deviation of the random intercept.

24  
25

26 Table S7: Hazard ratios (HRs) and 95%-confidence intervals (CI) from Cox regression with shared frailty  
 27 for additional sensitivity analyses

| Variable                                  | HR                 | CI          | HR              | CI          | HR            | CI          |
|-------------------------------------------|--------------------|-------------|-----------------|-------------|---------------|-------------|
| Analysis                                  | First<br>diagnosis |             | Censored<br>1yr |             | Excl.<br>2017 |             |
| Certified center (ref: no)                | -                  | -           | -               | -           | -             | -           |
| yes                                       | 0.87               | (0.83,0.91) | 0.88            | (0.84,0.92) | 0.89          | (0.85,0.93) |
| Year of index treatment (ref: 2009)       | -                  | -           | -               | -           | -             | -           |
| 2010                                      | 0.99               | (0.95,1.03) | 0.97            | (0.93,1.02) | 0.98          | (0.94,1.02) |
| 2011                                      | 0.96               | (0.92,1.00) | 0.95            | (0.91,1.00) | 0.95          | (0.91,0.99) |
| 2012                                      | 0.97               | (0.93,1.01) | 0.96            | (0.92,1.00) | 0.96          | (0.92,1.00) |
| 2013                                      | 0.97               | (0.93,1.01) | 0.94            | (0.90,0.99) | 0.96          | (0.92,1.00) |
| 2014                                      | 0.95               | (0.91,0.99) | 0.92            | (0.88,0.97) | 0.94          | (0.90,0.98) |
| 2015                                      | 0.90               | (0.86,0.94) | 0.89            | (0.85,0.93) | 0.90          | (0.86,0.94) |
| 2016                                      | 0.89               | (0.85,0.93) | 0.87            | (0.83,0.91) | 0.88          | (0.84,0.92) |
| 2017                                      | 0.86               | (0.82,0.90) | 0.86            | (0.81,0.90) | NANA          | ( NA, NA)   |
| Age (ref: 18-59)                          | -                  | -           | -               | -           | -             | -           |
| 60-79                                     | 1.47               | (1.42,1.52) | 1.52            | (1.46,1.58) | 1.45          | (1.40,1.50) |
| 80+                                       | 2.43               | (2.34,2.53) | 2.63            | (2.51,2.75) | 2.44          | (2.34,2.54) |
| Sex (ref: female)                         | -                  | -           | -               | -           | -             | -           |
| male                                      | 1.04               | (1.02,1.06) | 1.03            | (1.01,1.05) | 1.04          | (1.02,1.06) |
| Congestive heart failure (ref: no)        | -                  | -           | -               | -           | -             | -           |
| yes                                       | 1.14               | (1.11,1.17) | 1.18            | (1.15,1.22) | 1.14          | (1.11,1.17) |
| Cardiac arrhythmias (ref: no)             | -                  | -           | -               | -           | -             | -           |
| yes                                       | 0.98               | (0.96,1.00) | 0.99            | (0.97,1.02) | 0.98          | (0.96,1.01) |
| Valvular disease (ref: no)                | -                  | -           | -               | -           | -             | -           |
| yes                                       | 0.98               | (0.95,1.01) | 0.98            | (0.95,1.01) | 0.99          | (0.96,1.02) |
| Pulmonary circulation disorders (ref: no) | -                  | -           | -               | -           | -             | -           |
| yes                                       | 1.17               | (1.13,1.21) | 1.20            | (1.16,1.25) | 1.18          | (1.14,1.23) |
| Periph. vascular disorders (ref: no)      | -                  | -           | -               | -           | -             | -           |
| yes                                       | 1.03               | (1.01,1.06) | 1.06            | (1.03,1.08) | 1.06          | (1.03,1.08) |
| Hypertension, (uc) (ref: no)              | -                  | -           | -               | -           | -             | -           |
| yes                                       | 1.00               | (0.97,1.03) | 1.00            | (0.97,1.04) | 1.00          | (0.97,1.03) |
| Hypertension, (c) (ref: no)               | -                  | -           | -               | -           | -             | -           |
| yes                                       | 0.96               | (0.94,0.98) | 0.95            | (0.92,0.97) | 0.96          | (0.93,0.98) |
| Other neurological disorders (ref: no)    | -                  | -           | -               | -           | -             | -           |
| yes                                       | 1.18               | (1.14,1.22) | 1.22            | (1.18,1.26) | 1.18          | (1.15,1.22) |
| Chronic pulmonary disease (ref: no)       | -                  | -           | -               | -           | -             | -           |
| yes                                       | 0.96               | (0.94,0.98) | 0.96            | (0.94,0.98) | 0.97          | (0.95,0.99) |
| Diabetes (uc) (ref: no)                   | -                  | -           | -               | -           | -             | -           |
| yes                                       | 0.99               | (0.97,1.02) | 0.97            | (0.94,1.00) | 1.00          | (0.97,1.02) |
| Diabetes (c) (ref: no)                    | -                  | -           | -               | -           | -             | -           |

|                                     |        |             |        |             |        |             |
|-------------------------------------|--------|-------------|--------|-------------|--------|-------------|
| yes                                 | 1.05   | (1.02,1.08) | 1.05   | (1.02,1.08) | 1.04   | (1.01,1.07) |
| Renal failure (ref: no)             | -      | -           | -      | -           | -      | -           |
| yes                                 | 1.13   | (1.10,1.15) | 1.19   | (1.16,1.22) | 1.15   | (1.12,1.18) |
| Liver disease (ref: no)             | -      | -           | -      | -           | -      | -           |
| yes                                 | 0.99   | (0.97,1.01) | 1.01   | (0.99,1.04) | 1.00   | (0.98,1.02) |
| Blood loss anemia (ref: no)         | -      | -           | -      | -           | -      | -           |
| yes                                 | 1.06   | (1.00,1.12) | 1.09   | (1.02,1.16) | 1.08   | (1.02,1.15) |
| Deficiency anemia (ref: no)         | -      | -           | -      | -           | -      | -           |
| yes                                 | 1.03   | (1.00,1.06) | 1.05   | (1.02,1.09) | 1.03   | (0.99,1.06) |
| Alcohol abuse (ref: no)             | -      | -           | -      | -           | -      | -           |
| yes                                 | 1.15   | (1.11,1.20) | 1.22   | (1.17,1.27) | 1.16   | (1.12,1.21) |
| Drug abuse (ref: no)                | -      | -           | -      | -           | -      | -           |
| yes                                 | 1.07   | (1.01,1.14) | 1.06   | (0.99,1.14) | 1.07   | (1.00,1.14) |
| Other oncological disease (ref: no) | -      | -           | -      | -           | -      | -           |
| yes                                 | 0.83   | (0.81,0.85) | 0.85   | (0.83,0.87) | 0.85   | (0.83,0.87) |
| Distant metastasis (ref: no)        | -      | -           | -      | -           | -      | -           |
| yes                                 | 2.26   | (2.21,2.30) | 2.39   | (2.33,2.45) | 2.31   | (2.26,2.36) |
| Hospital beds (ref: 1-299)          | -      | -           | -      | -           | -      | -           |
| 300-499                             | 0.95   | (0.92,0.99) | 0.94   | (0.91,0.98) | 0.96   | (0.92,1.00) |
| 500-999                             | 0.89   | (0.85,0.93) | 0.86   | (0.82,0.90) | 0.89   | (0.85,0.93) |
| 1000+                               | 0.81   | (0.76,0.87) | 0.79   | (0.73,0.84) | 0.82   | (0.77,0.88) |
| Teaching hospital (ref: no)         | -      | -           | -      | -           | -      | -           |
| yes                                 | 0.96   | (0.93,0.99) | 0.94   | (0.91,0.98) | 0.95   | (0.92,0.99) |
| University hospital (ref: no)       | -      | -           | -      | -           | -      | -           |
| yes                                 | 0.81   | (0.75,0.89) | 0.79   | (0.72,0.87) | 0.82   | (0.75,0.89) |
| Hospital ownership (ref: public)    | -      | -           | -      | -           | -      | -           |
| non-profit                          | 1.00   | (0.96,1.03) | 0.99   | (0.95,1.02) | 1.00   | (0.97,1.04) |
| private                             | 1.01   | (0.97,1.06) | 1.01   | (0.97,1.06) | 1.02   | (0.98,1.06) |
| Number of patients                  | 45,318 |             | 45,318 |             | 40,462 |             |
| Number of hospitals                 | 1,051  |             | 1,051  |             | 1,043  |             |
| SD(RE)                              | 0.16   |             | 0.16   |             | 0.15   |             |
